# Supplementary material for: Mismatch recognition and subsequent processing have distinct effects on mitotic recombination intermediates and outcomes in yeast
Source: PubMed Central journal article supplement — Nucleic Acids Res. 2019 Feb 27;47(9):4554–68. doi: 10.1093/nar/gkz126 (PMC6511840; doi:10.1093/nar/gkz126), 2019-02-27
Supplement: gkz126_supplemental_file.pdf [file gkz126_supplemental_file.pdf]

**Table S1. Yeast strains**

| Strain  | Relevant genotype <sup>a</sup>                                                                                           | Comments/reference                                                                                     |
|---------|--------------------------------------------------------------------------------------------------------------------------|--------------------------------------------------------------------------------------------------------|
| SJR3714 | <i>MATa lys2::IScel</i>                                                                                                  | Derivative of MC42-2d<br>Guo <i>et al.</i> 2017                                                        |
| SJR3939 | <i>MATa lys2::IScel can1::lys2Δ3'-98%,IScelInc his3Δ::kanMX-pGAL-IScel</i>                                               | Guo <i>et al.</i> 2017                                                                                 |
| SJR4015 | <i>MATa lys2::CORE-UK</i>                                                                                                | CORE-UK cassette inserted into the <i>LYS2</i> locus of SJR3714                                        |
| SJR4016 | <i>MATa can1::lys2Δ3'-98%,IScelInc</i>                                                                                   | Donor only<br>Spore from HLK1042-2c x SJR3939                                                          |
| SJR4031 | <i>MATa can1::lys2Δ3'-98%,IScelInc-URA3-hisG</i><br>(= 98% donor/ <i>hisG</i> )                                          | SJR4016 transformed with <i>URA3-hisG</i> fragment amplified from pNKY51                               |
| SJR4194 | <i>MATa lys2,6Amut::IScel</i>                                                                                            | CORE-UK of SJR4015 replaced with mutated 6A run                                                        |
| SJR4195 | <i>MATa hisG-lys2,6Amut::IScel-URA3-hisG</i> (= <i>hisG</i> /recipient)                                                  | SJR4194 transformed with <i>hisG-URA3-hisG</i> fragment (pNKY51) and subsequently for <i>URA3</i> loss |
| SJR4196 | <i>MATa hisG</i> /recipient + 98% donor/ <i>hisG</i>                                                                     | Spore from SJR4195 x SJR4031                                                                           |
| SJR4258 | <i>MATa hisG</i> /recipient + 98% donor/ <i>hisG</i> + <i>his3Δ::hph-pGAL-IScel</i> (= I- <i>Scel</i> )                  | SJR4196 transformed with <i>his3Δ::hph-pGAL-IScel</i> from pSR952                                      |
| SJR4535 | <i>MATa hisG</i> /recipient + 98% donor/ <i>hisG</i> + I- <i>Scel mlh1Δ::loxP-TRP1-loxP</i>                              | SJR4258 transformed with <i>mlh1Δ::loxP-TRP1-loxP</i> fragment                                         |
| SJR4691 | <i>MATa hisG</i> /recipient + 98% donor/ <i>hisG</i> + I- <i>Scel msh6Δ::loxP-kanMX-loxP</i>                             | SJR4258 transformed with <i>msh6Δ::loxP-kanMX-loxP</i> fragment                                        |
| SJR4800 | <i>MATa hisG</i> /recipient + 98% donor/ <i>hisG</i> + I- <i>Scel msh6Δ::loxP-kanMX-loxP rad14Δ::loxP-TRP1-loxP</i>      | SJR4691 transformed with <i>rad14Δ::loxP-TRP1-loxP</i> fragment                                        |
| SJR4982 | <i>MATa HOM3</i> recipient + 98% donor + galactose-inducible I- <i>Scel mlh1Δ::loxP-TRP1-loxP msh6Δ::loxP-KanMX-loxP</i> | SJR4535 transformed with <i>msh6Δ::loxP-KanMX-loxP</i> fragment                                        |
| SJR5000 | <i>MATa hisG</i> /recipient <i>can1::lys2Δ3'-100%,I-ScelInc</i> (= 100% donor)                                           | SJR4195 transformed with pSR1154 fragment to introduce 100%-identical donor at <i>CAN1</i>             |
| SJR5003 | <i>MATa hisG</i> /recipient 100% donor/ <i>hisG</i>                                                                      | SJR5000 transformed with <i>URA3-hisG</i> fragment from pNKY51                                         |
| SJR5007 | <i>MATa hisG</i> /recipient 100% donor/ <i>hisG mlh1Δ::loxP-TRP1-loxP</i>                                                | Spore from SJR5003 x SJR4535                                                                           |
| SJR5036 | <i>MATa hisG</i> /recipient + 100% donor/ <i>hisG</i> + I- <i>Scel</i>                                                   | Spore from SJR5007 x SJR4691                                                                           |
| SJR5037 | <i>MATa hisG</i> /recipient + 100% donor/ <i>hisG</i> + I- <i>Scel mlh1Δ::loxP-TRP1-loxP</i>                             | Spore from SJR5007 x SJR4691                                                                           |
| SJR5038 | <i>MATa hisG</i> /recipient + 100% donor/ <i>hisG</i> + I- <i>Scel msh6Δ::loxP-KanMX-loxP</i>                            | Spore from SJR5007 x SJR4691                                                                           |
| SJR5039 | <i>MATa hisG</i> /recipient + 100% donor/ <i>hisG</i> + I- <i>Scel mlh1Δ::loxP-TRP1-loxP msh6Δ::loxP-KanMX-loxP</i>      | Spore from SJR5007 x SJR4691                                                                           |

<sup>a</sup> All strains were derived from W303 derivatives MC42-2d (*MATa RAD5 leu2-3,112 his3-11,15 ura3-1 trp1-1 ade2-1*) and HLK1042-1c (*MATa RAD5 leu2-3,112 his3-11,15 ura3-1 trp1-1 ade2-1 hom3-10*). Only the changes introduced by transformation or mating are given. With the exception of HLK1042-1c, all strains are *HOM3*.

**Table S2. Observed and corrected numbers of NCO and CO events**

| Substrates | Strain                                   | Observed numbers of events |    |        |      |       | Corrected numbers of events |       |                 |       |       |
|------------|------------------------------------------|----------------------------|----|--------|------|-------|-----------------------------|-------|-----------------|-------|-------|
|            |                                          | NCO                        | CO | CO+NCO | Ura- | Total | NCO <sup>1</sup>            |       | CO <sup>2</sup> |       | Total |
|            |                                          |                            |    |        |      |       | No.                         | Prop. | No.             | Prop. |       |
| 100%       | WT<br>(SJR5036)                          | 228                        | 23 | 36     | 0    | 287   | 264                         | 0.763 | 82              | 0.237 | 346   |
|            | <i>mlh1</i> Δ<br>(SJR5037)               | 230                        | 15 | 39     | 0    | 284   | 269                         | 0.796 | 69              | 0.204 | 338   |
|            | <i>msh6</i> Δ<br>(SJR5038)               | 235                        | 14 | 40     | 0    | 289   | 275                         | 0.802 | 68              | 0.198 | 343   |
|            | <i>msh6</i> Δ <i>mlh1</i> Δ<br>(SJR5039) | 232                        | 18 | 35     | 0    | 285   | 267                         | 0.790 | 71              | 0.210 | 338   |
| 98%        | WT<br>(SJR4258)                          | 422                        | 29 | 14     | 13   | 478   | 436                         | 0.816 | 98              | 0.184 | 534   |
|            | <i>mlh1</i> Δ<br>(SJR4535)               | 438                        | 18 | 14     | 1    | 471   | 452                         | 0.897 | 52              | 0.103 | 504   |
|            | <i>msh6</i> Δ<br>(SJR4691)               | 388                        | 44 | 41     | 4    | 477   | 429                         | 0.758 | 137             | 0.242 | 566   |
|            | <i>msh6</i> Δ <i>mlh1</i> Δ<br>(SJR4982) | 215                        | 30 | 41     | 0    | 286   | 256                         | 0.717 | 101             | 0.283 | 357   |

<sup>1</sup> Corrected NCO = observed(NCO) + observed(CO+NCO)

<sup>2</sup> Corrected CO = 2(observed CO + Ura<sup>-</sup>) + observed(CO+NCO)

GCGCTTTGAAAAGGCCAAACTATCGAAGGACAAGCCAACCATAATCAAGGTAACACTACTACAATTGGATTGGGTCCCTACAACAGGGTACTGCTGGTGTTCATGGTCCGCTTTGAAGGCAGATGATGTTAAACAGTTGAAGAAGAGGTGGGGTTTGC  
 ACCCAAATAAATCATTTGTAGTACCTCAAGAGGTGTAACGATTATTATAAGAAGACTGTTGTGGAACCCGGTCAAAAACCTAATGAGGAATGGGATAGGATGTTTGAAGAATACAAAACCAAATTTCCCGAGAAGGTTAAAGAATTGCAAAGAAGATTGA  
 ATGGTGAAGTACCGGAAGGTTGGGAAAAGCATTACCAGAACTTACTCCGGACGACGATGCTCTGGCAACAAGAAAGACATCCCAGCAGGTGCTGACGAACATGGTCCAAGTTTTGCCTGAATTGATCGTTGGTCTGCCGATTGACACCTTCGAATC  
 TGACAAGGTGGGAAGGCGCGGTAGATTTCACACTCCATTACCCAACTAGGTAACATATGCAGGAAGGTACATTAGATACGGTGTGAGGGAACACGGAATGGGTGCCATTATGAACCGGTATCTCTGCCTTTGGTGCAAACTACAAGCCTTACGGTGGTA  
 CCTTTTGAACCTCGTCTCTTATGCTCAGGAGCCGTTAGGTTAGCCGCTTGTCTGGTAAACGAGTCATTTGGGTTGCAACACATGACTCTATCGGGCTTGGTGGAGATGGTCAACGCACCAACCTATTGAAACTCTGGCTCACTTGAGGGCTATTTC  
 CAAACAATGCATGTATGGAGACCTGCTGATGTTAACGAACTTCTGCTGCTATTATTCTGCTATCAAATCTGGTGAACACCATCTGTTGTGGCTTTATCAGACAGAATCTTCTCAATTGGAGCATTCTCTTTTAAAAAGCCTTGAAGGGTGGCT  
 ATGTGATCCATGACGTGGAGAATCCTGATATTATCCTGGTGTCAACAGGATCAGAAGTCTCCATTCTATAGATGCAGCCAAAAAATTGTACGATACTAAAAAATCAAAGCAAGAGTTGTTCCCTGCCAGACTTTTATACTTTTGACAGGCAAAGTG  
 AAGAATACAGATTCTCTGTTTACCAGACGGTGTCCGATCATGTCTTTGAAGTATTGGCTACTTCAAGCTGGGTAAGTATGCTCATCAATCGTTCGGACTCGACGAATTTGGTCTGTTGAGGCAAGGGGCTGAAATTTACAAATTTGTCGATTTCA  
 CAGCGGACGGTGTTCGCTCAAGGGCTGAAAAGACAATCAATTAATAAGGAAAGCAGTTGCTTTCTCTATGGGAAGAGCTTTCTAAGTCTGAAGAAGTAAACAGTTCTTTGCTATTTCACACTTCTGGTTGATGGTCACTTGTCTGCCTGAAATAT  
 ATATATATGTATGACATATGACTTGTGTTTTCTTTTTGTGCCCTTGTACGCTCTATATTCAATGAAACTGATTATTCGATTTTCTTCTGCTGACCGCTTTAGAGGCATCGCACAGTTTTAGCGAGGAAAACCTTCAATAGTTTTGCCAGCGGAATT  
 CCACCTTGCATTAACATAAAAAATTCGGCGGTTTTTCGCGTGTGACTCAATGTCGAAATACCTGCCTAATGAACATGAACATCGCCAAATGTATTGAAGACCCGCTGGGAGAAGTTCAAGATATATAAGTAACAAGCAGCCAATAGTATAAAAAAA  
 ATGTGAGTTTATTACCTTTCTGGAATTCAGTAAAAACTGCTAATTATAGAGAGATATCACAGAGTTACTACTAATGACTAAAGAAAAGTCTGGATAGAGAAGTTGGATAATCCAACCTTTTCAGTGTACCACATGACTTTTTACGCCACAAC  
 AAGAACCTTATACGAAACAAGTACATATTGTTACAGCTACCTCAGCTCGATGTCCTCATGATAGTTTTCTAACAAATACGCTGTGCTTTGAGTGTATGGGCTGCATTGATATAATAGATAACCGGTGACGATGATATGTTCTTTATATTGCGA  
 ATAACAAAATCTTAAAGATTCAATATCAACCAACGTGGTCATTTAATGAGCTGTATTCTACAATTAACAATGAGTTGAACAAGCTCAATCTATTGAGGCCAATTTTTCTCTTTCGACGAGCTAGCTGAATCAATCAAAGTTGCCAAGATCAATTACCTT  
GTTATCCCTAGATCTGGAAGGACCCCTCAGTTGTTCCGTTTGGCCTTTTGGAAAACCAAGATTTCAAATTAGACGAGTTCAAGCATCATTTAGTGGACTTTGCTTTGAATTTGGATACCAGTAATAATGCGCATGTTTTGAACTTAATTTATAATTC  
 AGCTTACTGTATTGAAAGAAAGATTAACCAATTTGTTGGGACCAATTTACTCAATATTTGACTGCTGCGCTAAGCGATCCATCCAATTCATAACTAAAATCTCTCTGATCACCGCATCATCCAAGGATAGTTTACCTGATCCAACCTAAGAACTTGGGC  
 TGGTGCATTTCTGTTGGGTGTATTCCAGACATTTCCAGGACAATGCTGAAGCCTTCCCAGAGAGAACCCTGTGTTGTGGAGACTCCAACTAAATTCGACAAAGTCCCGTCTTTCACTTATCGCGACATCAACCGCACTTCTAACATAGTTGCCCAT  
 TATTTGATTAACACAGGTATCAAAGAGGTGATGTAGTATGATCTATTCTTCTAGGGGTGTGATTGATGGTATGTGTGATGGGTGCTTTGAAGCCGGCGCAACCTTTTCAGTTATCGACCCCTGCATATCCCCAGCCAGACAAACATTTACTTA  
 GGTGTTGCTAAACACAGTGGGTGATGTTATTAGAGCTGCTGGACAATTTGGATCAACTAGTAGAAGATTACATCAATGATGAATTTGGAGATTGTTTCAAGAATCAATCCATCGCTATTCAGAAAATGGTACCATTGAAGGTGGCAAATTTGGACAAT  
 GGCGAGGATGTTTTGGCCCATATGATCACTACAAAGACACCAGAACAGGTGTTGTAGTTGGACCCGATTTCAACCCCAACCCATCTTTTACATCTGGTTCGGAAGTATTCCTAAGGTGTTCTTGGTAGACATTTTTCTTGGCTATTATTTCAAT  
 TGGATGTCAAAAGGTTCAACTTAACAGAAAATGATAAATTCACAATGCTGAGCGGTATTGCACATGATCCAATTCAAAGAGATATGTTTACACCATTATTTTTAGGTGCCCAATTGTATGTCCCTACTCAAGATGATATTGGTACACCGGGCCGTTTA  
 GCGGAATGATGAGTAAGTATGGTGCACAGTTACCCATTTAACACCTGCTATGGGTCAATTACTTACTGCCAAGCTACTACACCATTCCCTAAGTTACATCATGCGTCTTTGTGGGTGACATTTTAAACAAAACGTGATTGTCTGAGTTTACAACC  
 TTGGCAGAAAATTGCCGTATTGTTAATATGTACGGTACCCTGAAACACAGCGTGCAGTTTCTTATTTCGAAGTTAAATCAAAAAATGACGATCCAACCTTTTTGAAAAAATTGAAAGATGTCATGCTGCTGGTAAAGGTATGTTGAACGTTACGCTA  
 CTAGTTGTTAACAGGAACGATGCTACTCAAATATGTGGTATTGGCGAAAATAGGTGAGATTTATGTTCTGTCAGGTGGTTTGGCCGAAGGTTATAGAGGATTACCAGAATTGAATAAAGAAAAATTTGTGAACAACCTGGTTTGTGAAAAAGATCACTGG  
 AATTATTTGGATAAGGATAATGGTGAACCTTGGAGACAATTTGGTTAGGTCCAAGAGATAGATTGTACAGAACGGGTGATTTAGGTGCTTATCTACAAACCGGTGACTGTAATGTTGCGGTAGGGCTGATGATCAAGTTAAAAATTCGTGGGTTCAGA  
 ATCGAATTAGGAGAAATGATACGCACATTTCCCAACATCCATTGGTAAGAGAAAACATTAATTTGTTTCGCAAAAATGCCGACAATGAGCCAACATTGATCACATTTATGGTCCCAAGATTTGACAAGCCAGATGACTTGTCTAAGTTCCAAAGTGAT  
 GTTCCAAAGGAGGTTGAAACTGACCCATAGTTAAGGGCTTAATCGGTTACCATCTTTTATCCAAGGACATCAGGACTTTCTTAAAGAAAAGAT

**Figure S1.** Homology between *lys2* substrates. The sequence shown is that of the recipient allele. The ATG start codon is red; the inserted I-SceI cut site is highlighted yellow and the region flanked by nicks is underlined. The SNPs that are present in the donor allele are above the sequence and are highlighted gray.

**A**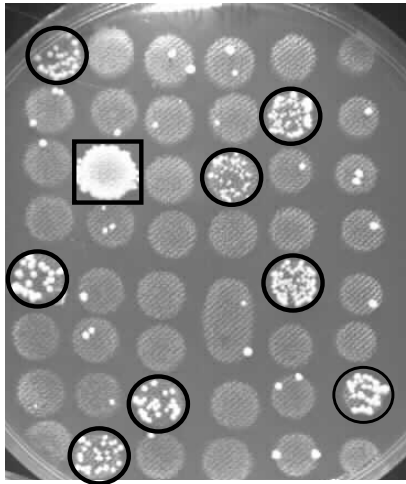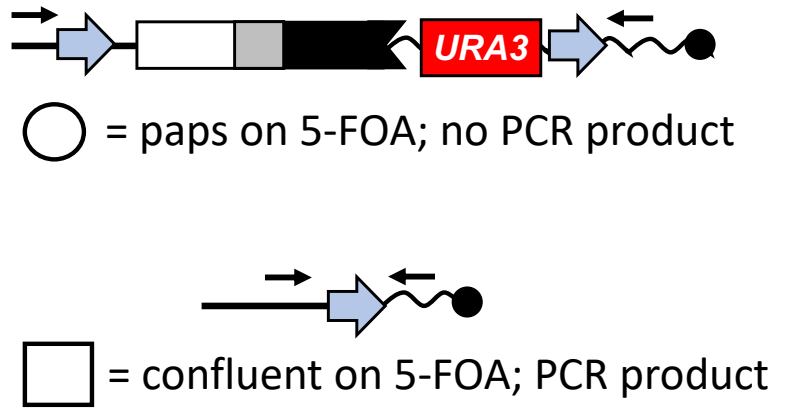**B**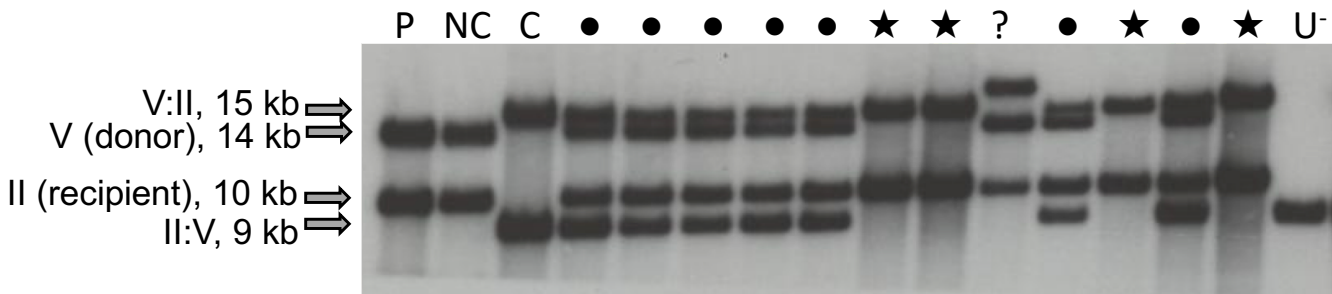

**Figure S2.** Characterization of CO and NCO events. **(A)** Phenotype screen for CO events on 5-FOA medium. CO events (circles) pap at a high frequency because of *hisG* repeats that flank the *URA3* marker while NCO events produce few paps on 5-FOA. A secondary CO between the *hisG* repeats results in confluent growth (box). Only fully Ura<sup>-</sup> COs produce a PCR product with the indicated primers (small horizontal arrows). **(B)** Southern analysis of colonies that contain both a CO and NCO chromosome by PCR. Lanes marked with a dot contain both CO and both normal chromosomes; lanes marked with a star contain only chromosomes V:II and II. P, parent; NC, NCO; C, CO; U<sup>-</sup>, Ura<sup>-</sup> colony.

**A**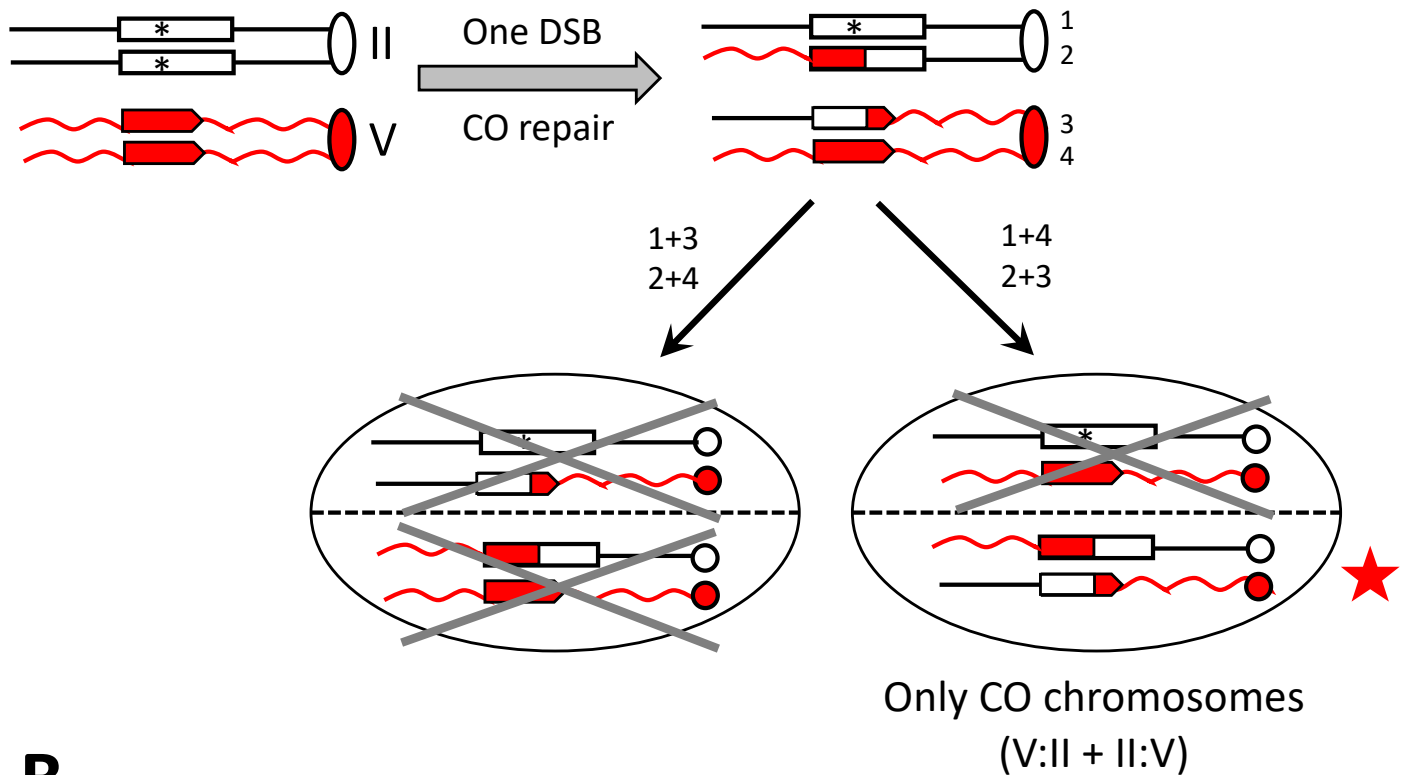**B**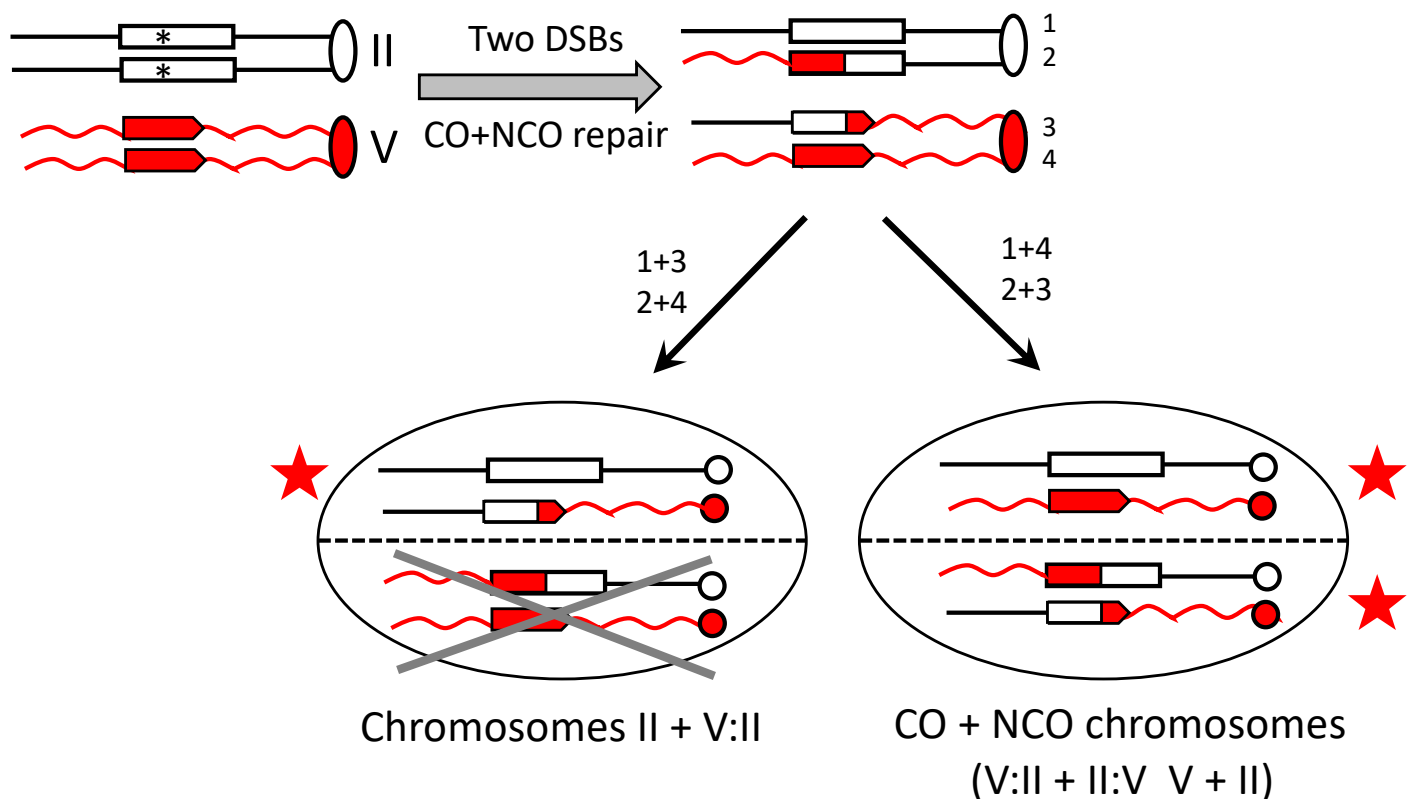

**Figure S3.** Chromosome segregation and cell viability following DSB repair. **(A)** Only one sister chromatid is cleaved by I-SceI and repair generates reciprocal CO products. PCR only detects a CO chromosome. **(B)** Both sister chromatids are cleaved; one is repaired as a CO and the other as a NCO. PCR detects both a CO and NCO chromosome and a Southern blot detects either chromosomes II + II:V or all four chromosomes. Gray X, Lys<sup>-</sup> or inviable; red star, Lys<sup>+</sup> and viable.

**A****Uncorrected numbers and proportions of COs and NCOs produced from a single DSB**

| Substrates | Strain                          | Observed numbers of events |    |      |       | Uncorrected total events |       |     |       |
|------------|---------------------------------|----------------------------|----|------|-------|--------------------------|-------|-----|-------|
|            |                                 | NCO                        | CO | Ura- | Total | NCO                      |       | CO  |       |
|            |                                 |                            |    |      |       | No.                      | Prop. | No. | Prop. |
| 100%       | WT<br>(SJR5036)                 | 228                        | 23 | 0    | 251   | 228                      | 0.908 | 23  | 0.092 |
|            | <i>mlh1Δ</i><br>(SJR5037)       | 230                        | 15 | 0    | 245   | 230                      | 0.939 | 15  | 0.061 |
|            | <i>msh6Δ</i><br>(SJR5038)       | 235                        | 14 | 0    | 249   | 235                      | 0.944 | 14  | 0.056 |
|            | <i>msh6Δ mlh1Δ</i><br>(SJR5039) | 232                        | 18 | 0    | 250   | 232                      | 0.928 | 18  | 0.072 |
| 98%        | WT<br>(SJR4258)                 | 422                        | 29 | 13   | 464   | 422                      | 0.909 | 42  | 0.091 |
|            | <i>mlh1Δ</i><br>(SJR4535)       | 438                        | 18 | 1    | 457   | 438                      | 0.958 | 19  | 0.042 |
|            | <i>msh6Δ</i><br>(SJR4691)       | 388                        | 44 | 4    | 436   | 388                      | 0.890 | 48  | 0.110 |
|            | <i>msh6Δ mlh1Δ</i><br>(SJR4982) | 215                        | 30 | 0    | 245   | 215                      | 0.878 | 30  | 0.122 |

**B**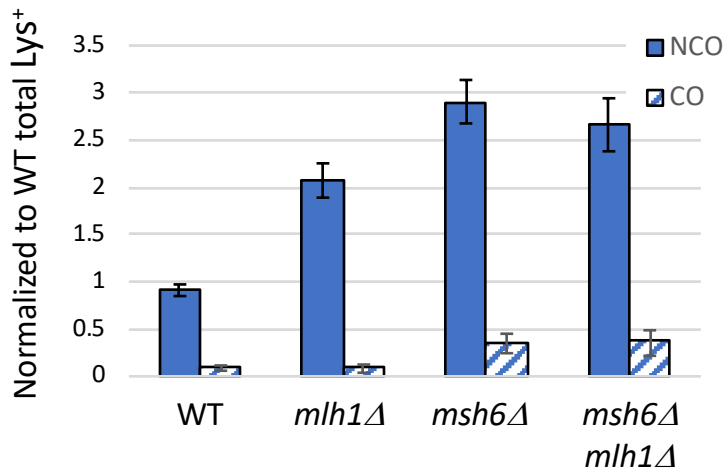**C**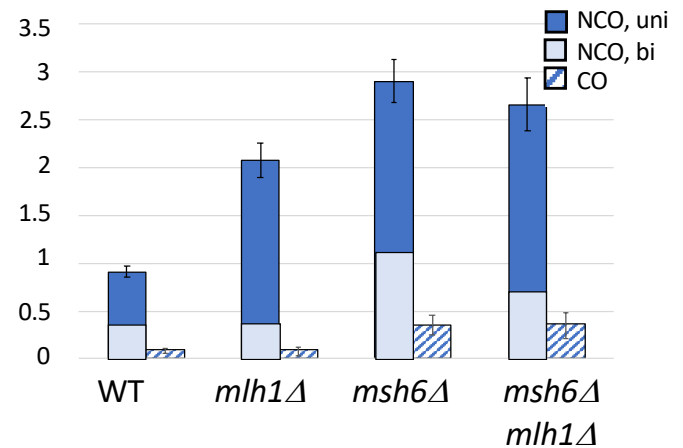

**Figure S4.** Uncorrected numbers, proportions and frequencies of COs and NCOs. **(A)** Only colonies that resulted from repair of a single DSB were considered; the CO+NCO class from Table S1 was omitted. The total COs correspond to the sum of the CO and Ura<sup>-</sup> classes without the additional correction for loss of COs due to inviability. **(B)** The NCO and CO frequencies for 98%-identical substrates were calculated as in Figure 3B, but the uncorrected proportions in (A) were used. **(C)** Uncorrected version of Figure 5, which was calculated using uncorrected proportions in (A).
